# Supplementary material
Source: PubMed Central journal article supplement (PMC5838629)
Supplement: jamapsychiatry-75-149-s001.pdf [file jamapsychiatry-75-149-s001.pdf]

1 Original Trial Protocol

2 **Date of Application:** 2010-05-13

3 **Title of Study:** Depression, Estrogen Replacement, and Cardiovascular Health in the  
4 Perimenopause

5 **Name and degrees of Principal Investigator(s):** Susan S. Girdler, PhD & David Rubinow,  
6 M.D.

7 **Name of funding source or sponsor:** National Institute of Mental Health

8 **Amendments Made to the Following Protocol:**

9 **Unless otherwise stated, the following changes were made to the study exclusion criteria to**  
10 **facilitate participant recruitment:**

- 11 • Women with borderline elevated LDL (190 – 200 mg/dl) at baseline were allowed to enter  
12 the trial if their physician was not intending to treat them over the course of the subsequent  
13 12 months **(2010-11-16)**.
- 14 • Early postmenopausal women (in STRAW +1b) were allowed to enter the trial **(2010-12-**  
15 **30)**.
- 16 • Women with a history of >1 biopsy were allowed to enter the trial if there was no personal  
17 or family history of breast cancer in the first or second degree relatives and if the  
18 documented histologic findings for all biopsies were consistent with the following:  
19 fibrocystic changes (within the normal range - cysts and ductal ectasia, mild hyperplasia,  
20 nonsclerosing adenosis, and periductal fibrosis, simple fibroadenoma, and miscellaneous  
21 (lobular hyperplasia, juvenile hypertrophy, and stromal hyperplasia)); benign tumors  
22 (hamartoma, lipoma, phyllodes tumor, solitary papilloma, neurofibroma, giant adenoma, and  
23 adenomyoepithelima); traumatic lesions (hematoma, fat necrosis, and lesions caused by  
24 penetration by a foreign body); infections (granuloma and mastitis); sarcoidosis; metaplasia  
25 (squamous and apocrine); diabetic mastopathy **(2010-12-30)**.
- 26 • The requirement that all women have an FSH level >2 SD above mean premenopausal levels  
27 was removed **(2011-02-17)**.
- 28 • Women without a uterus but with at least one ovary retained were allowed to enter the trial  
29 if: 1) they were experiencing vasomotor symptoms and their baseline estradiol levels were  
30 above postmenopausal concentrations (> 40 pg/ml) or, 2) they were not experiencing  
31 vasomotor symptoms but had baseline estradiol > 40 pg/ml and baseline FSH levels > 14  
32 pg/ml, which is two standard deviations above the mean level of a previously-recruited  
33 sample of reproductive-aged women, in line with STRAW staging guidelines **(2011-03-04)**.
- 34 • If a participant knew the complete family history for the mother's side but none or only  
35 partial history for the father's side, it was decided that the study gynecologist would evaluate  
36 whether transdermal estradiol would be contraindicated based on the history provided – if  
37 not, she could enter the trial **(2012-09-20)**.
- 38 • Women with a single episode of past depression were considered eligible if their single  
39 episode met the following criteria: the duration was at least 3 months, at least 6 of 9 MDD

- 40 symptoms were experienced (exceeding the required 5-symptom threshold), and the episode  
41 occurred as an adult (not in childhood or early adolescence) **(2013-08-05)**.
- 42 • The acceptable age range extended from 45-55 to 45-60 **(2014-02-27)**.
  - 43 • The exclusion criteria related to psychiatric history were changed to exclude women with:  
44 history of suicide attempts; history of bipolar and related disorders or schizophrenia  
45 spectrum and other psychotic disorders; history of severe substance use if it was in the past  
46 10 years; less than two years in remission from substance use disorders, bulimia nervosa,  
47 anorexia nervosa, or posttraumatic stress disorder; current psychiatric diagnosis of binge  
48 eating disorder, a neurodevelopmental disorder, or a trauma- and stress-related disorder  
49 (except for posttraumatic stress disorder) with severity greater than mild **(2014-02-27)**.
  - 50 • Women having had a bilateral oophorectomy were allowed into the trial if the procedure had  
51 occurred within 24 months and the participant had been menstruating regularly prior to the  
52 procedure **(2014-02-27)**.
  - 53 • The requirement of having a baseline CES-D score  $\leq 8$  was increased to  $\leq 16$  **(2010-11-16)**  
54 and later removed altogether **(2014-02-27)**.
  - 55 • The acceptable body mass index range was lowered to  $<30$  due to concerns that estradiol  
56 therapy may be less safe in obese women **(2011-08-18)** but was later increased to  $<35$  based  
57 on research suggesting that transdermal estradiol, specifically, was not related to an  
58 increased health risk in these women **(2014-04-04)**.

59

#### 60 **Changes made to study protocol:**

- 61 • Rather than starting a participant on 0.1 mg of estradiol immediately, the protocol was  
62 changed so that participants started on 0.025 mg for two weeks, then 0.05 mg patch for the  
63 next four weeks, and a 0.1 mg patch for the remainder of the study **(2011-02-14)**.
- 64 • To avoid very heavy bleeding following progesterone administration, the schedule for  
65 administering progesterone was changed from every three months to every two months  
66 **(2011-07-08)**.
- 67 • Participant compensation was increased to \$1325 when study visits at months 6 and 12  
68 began occurring separately from the months 6 and 12 laboratory visits **(2012-05-15)**.
- 69 • Following randomization, participants were given the option to participate in four follow-up  
70 phone calls in which the CES-D was administered (months 15, 18, 21 and 24) for an  
71 additional \$100 in compensation **(2012-05-15)**.

72

#### 73 **Brief Summary**

74 Purpose: The purpose of this study is threefold: 1) to examine cardiovascular risk factors in  
75 perimenopausal women with or without histories of recurrent depression; and the role of  
76 cumulative trauma exposure in the relationship of histories of depression to cardiovascular  
77 risk; 2) to examine progression in cardiovascular risk and the development of depressive  
78 episodes over 12 months in perimenopausal women with or without a history of recurrent  
79 depression who are not being treated with estradiol replacement therapy (ERT); and 3) to  
80 examine predictors and mediators of ERT - related treatment efficacy for both depression and  
81 cardiovascular risk.

82 Participants: Three hundred and twenty (320) women, 45 – 55 years of age undergoing a natural  
83 perimenopause ( $\geq 2$  skipped cycles and an interval of amenorrhea  $\geq 60$  days with FSH  $> 2$   
84 SD above mean premenopausal levels) will be tested such that half ( $n= 160$ ) will have a  
85 history of recurrent DEP (2+ episodes of depression, at least one of which is major  
86 depression) but be in remission, while the other half will be recruited as never depressed  
87 controls, matched for age and current low depressive symptoms ( $\leq 8$  on the CES-D 20-item  
88 depression scale). All subjects will be medically healthy perimenopausal women, 45 – 55  
89 years of age with no contraindications for ERT.

90 Procedures (methods): Subjects will be tested at baseline for indices of cardiovascular risk  
91 (cardiovascular stress reactivity, metabolic risk, cardiac autonomic tone, and endothelial  
92 function) and for depressive symptoms, functional impairment, menopausal symptoms,  
93 negative life events, diet and exercise. Lifetime trauma exposure will also be determined.  
94 Using a placebo-controlled, double-blind design, following baseline assessments, half of the  
95 women in each group (history of depression or never depressed) will be randomized to either  
96 transdermal  $17\beta$ -E2 (100ug/day) or placebo for 12 months (oral micronized progesterone will  
97 be given every 3 months to women on active ERT to protect the endometrium and placebo  
98 progesterone given to women on placebo ERT). Subjects will be assessed at months 1, 2, 4,  
99 6, 8, 10 and 12 for compliance, vitals, side effects, depressive symptom severity and  
100 functional impairment (also menopausal symptoms, diet, and exercise). At months 6 and 12,  
101 all CV risk measures conducted at the baseline (described above) will be repeated.

## 102 **Purpose and Rationale**

103 The following are the driving assumptions of this study:

104 **1. Depression and CVD display reciprocal risks:** Both animal and human studies demonstrate  
105 a strong link between DEP – a major source of morbidity – and CVD – the leading killer of  
106 women in the US. Patients with CVD are more likely to develop DEP (e.g., the prevalence of  
107 DEP in patients with congestive heart failure reportedly reaches 40%);, and conversely, the  
108 presence of DEP in patients with CVD predicts increased morbidity and mortality. This risk  
109 applies as well to women with depressive symptoms (50% greater likelihood of dying a cardiac  
110 death) and even euthymic individuals with a history of DEP (see below).

111 **2. The risk of DEP and CVD increases during the perimenopause:** Although age is likely the  
112 major cause of the rapid increase in the incidence of CVD in PM women, the importance of  
113 estradiol in CV risk is supported by the substantial increase in CVD in women undergoing early  
114 menopause, oophorectomy without estrogen replacement, or premature ovarian failure, a disorder  
115 associated with impaired endothelial function and increased CV mortality. Studies in  
116 cynomolgus macaques also demonstrate that impaired ovarian function is associated with  
117 extensive coronary atherosclerosis. Thus, loss of estrogen appears to contribute to the higher  
118 incidence of CVD morbidity and mortality in older women. Studies have demonstrated at least  
119 a twofold increase in depression in women during the perimenopause, and our group has shown  
120 that estrogen withdrawal precipitates depression in women on hormone replacement therapy  
121 (HRT) (combined estrogen plus progestin) with a history of perimenopausal depression.

122 **3. Depression, CVD, and estrogen deficiency share common pathophysiologic**  
123 **perturbations, which collectively constitute a risk profile for CVD and depression.** These  
124 include the following: 1) Immune activation and inflammation; 2) Endothelial dysfunction; 3)  
125 Cardiac Autonomic Dysregulation; and 4) Metabolic Risk. It is well established that each of  
126 these factors predicts CVD and, as well, is associated with both depression and post-menopausal  
127 status.

128 **4. A past history of depression, and factors that lead to depression (traumatic events),**  
129 **predispose toward an adverse profile of these mediators of pathophysiology.**

130 Substantial evidence suggests that euthymic individuals with histories of recurrent depression  
131 show greater rates of CVD, a pro-inflammatory state, impaired endothelial function, altered  
132 cardiac autonomic control, and elevated metabolic risk at levels equivalent to those seen in  
133 current depression. Based on this and evidence suggesting that histories of depression may  
134 predict the development of depression as well as functional impairment in the perimenopause,  
135 **we will employ historical recurrent depression as a model of vulnerability to depression.** In  
136 view of the shared physiologic perturbations seen in CVD and depression, perturbations that are  
137 likely to be amplified in the setting of estrogen deficiency, we predict that during the  
138 perimenopause, women with histories of depression will demonstrate greater likelihood of  
139 affective dysregulation (depression episodes, severity of depressive symptoms, functional  
140 impairment, and affective instability) and progression of cardiovascular risk.

141 Because stress **elicits a cascade of interrelated physiologic responses that negatively impact**  
142 **each of the “pathways” of risk described above,** exaggerated stress reactivity may play a  
143 pivotal role in the pathogenesis and comorbidity of depression and CVD. Cardiovascular  
144 reactivity to stress predicts cardiac events and the progression of atherosclerosis. Stress also  
145 activates proinflammatory cytokines in the periphery and CNS. Stress responses are also likely  
146 to play a role in metabolic risk., since glucocorticoids induce insulin resistance and individuals  
147 at metabolic risk show alterations in both sympathetic and hypothalamic-pituitary-adrenal  
148 (HPA)-axis activity. Thus, greater cardiovascular, inflammatory and HPA axis reactivities to  
149 stress (documented in both depression and in peri- and postmenopausal women), may comprise a  
150 phenotypic profile of risk that characterizes both depression and CVD. Further, a history of  
151 trauma exposure, which increases the risk for depression, metabolic disorders, and CVD and is  
152 associated with exaggerated sympathetic and HPA-axis reactivity. Thus, we predict that lifetime  
153 trauma exposure will explain some of the association between histories of depression and  
154 heightened physiologic risk during the perimenopause.

155 **5. Estrogen replacement therapy (ERT) in the perimenopause may prevent the**  
156 **progression of the pathophysiological risk profile associated with CVD and DEP and the**  
157 **emergence of affective dysregulation.**

158 In animals and humans, E2 is associated with beneficial effects on inflammation, endothelial  
159 dysfunction, cardiac autonomic dysregulation, and metabolic risk. Our own work and that of  
160 others has also shown that in perimenopausal and early (but not late) postmenopausal women,  
161 ERT is also effective in reducing depressive symptoms in women experiencing major or minor  
162 depression, as well as subsyndromal affective symptoms. Additionally, we have demonstrated  
163 that estradiol withdrawal precipitates depression in women with a history of perimenopausal  
164 depression but not in those lacking that history.

165 The beneficial effects of estrogen on CV risk markers demonstrated in controlled trials is  
166 consistent with the results from the majority of observational studies showing cardioprotective  
167 effects of ERT/HRT in postmenopausal women. Several large secondary and primary prevention  
168 trials of ERT/HRT, however, have challenged the safety and efficacy of HRT. Nonetheless,  
169 secondary subgroup analyses and one secondary analyses of surrogate endpoints from the  
170 Women’s Health Initiative (WHI) study are consistent with animal studies that, together, support  
171 the “timing hypothesis;” i.e., the effect of estrogen on CVD risk depends on when therapy is  
172 started relative to the onset of ovarian failure: beneficial or neutral if started in the  
173 perimenopause and adverse if started later. Recent reports from the North American Menopause  
174 Society and the Endocrine Society confirm that the risk of CVD in the WHI was observed in  
175 older but not younger women. Also, the formulation of estrogen used in the WHI (i.e., premarin)  
176 is associated with an increased profile of risk compared with transdermal estradiol.

177

178 What is not controversial is the existence of variance in both the cardioprotective and  
179 antidepressant effects of estradiol, making it critically important to identify those for whom  
180 beneficial effects of ERT on cardiovascular and mood regulation can be predicted.  
181 Consequently, the aim of the proposed research is to first identify a profile (physiologic and  
182 phenomenologic) of risk for mood dysregulation and CVD during the perimenopause, and then  
183 identify those factors that predict the greatest benefits of ERT in the prophylaxis of the  
184 progression of CV risk and appearance of depression.

185 Availability of predictors of increased risk of depression or CVD during the perimenopause - or  
186 of the risks or benefits of estradiol replacement - would significantly advance the goal of  
187 individualized medicine, significantly impact public health through decreasing the risk of these  
188 prevalent and disabling disorders, and potentially advance our understanding of the  
189 pathophysiology of depression unrelated to the perimenopause.

## 190 **Subjects**

191 A total of about four hundred and fifty (450) naturally perimenopausal women, 45 – 55  
192 years of age, will be enrolled into the protocol. Of those we predict will reach randomization  
193 following all medical and psychiatric assessments (n=320), exactly one-half (n=160) will be  
194 specifically recruited to have a history of recurrent depression, defined as 2+ prior episodes  
195 of depression at least one of which must be an episode of major depressive disorder, while  
196 other episodes may include minor depressive disorder or dysthymic disorder. All subjects  
197 will be medically healthy volunteers with no contraindications for ERT.

## 198 **Inclusion Criteria**

- 199 • Natural perimenopause ( $\geq 2$  skipped cycles and an interval of amenorrhea  $\geq 60$  days with  
200 FSH  $> 2$  SD above mean premenopausal levels)
- 201 • 45 – 55 years of age
- 202 • Normal mammogram within one year of study entry
- 203 • Normal breast, pelvic and endometrial exam
- 204 • Current low level depressive symptoms (CES-D score  $< 8$ )

- 205 • Five or more years in remission from any anxiety disorders, substance abuse, or eating  
206 disorders.  
207

208 **General Exclusion Criteria:**

- 209 • Endometrial hyperplasia (confirmed by endometrial ultrasound and/or biopsy)  
210 • Abnormal uterine anatomy (e.g. fibroids)  
211 • History of thrombophlebitis or thromboembolic disorders  
212 • History of estrogen-dependent neoplasias  
213 • Gall bladder disease  
214 • Liver dysfunction or other disorders for which estrogen or progesterone use is  
215 contraindicated  
216 • History of any CVD including coronary artery disease, arteriosclerosis, heart attack, or  
217 stroke  
218 • Atrial fibrillation, frequent premature atrial or ventricular beats, or other rhythm  
219 abnormalities  
220 • Type I or Type II diabetes  
221 • Known sensitivities to any ingredient in the Climara® transdermal estradiol system or  
222 Prometrium® (oral micronized progesterone)  
223 • Stage 1 or 2 hypertension (SBP  $\geq$  140 mmHg or DBP  $\geq$  90 mmHg)  
224 • Fasting low density lipoprotein (LDL) levels  $\geq$  190 mg/dl  
225 • BMI  $>$  37  
226 • Use of psychotropics, antihypertensives, statins, or hormonal preparations, or frequent  
227 use of anti-inflammatory agents ( $>$  10 times/month).  
228 • Use of herbals indicated for menopausal symptoms (e.g. black cohosh) and/or mood (e.g.  
229 St. John's Wort). Other herbals may be permitted if cleared by the study physicians.  
230 • History of suicide attempts  
231 • Current Axis I psychiatric diagnosis (e.g., depression, anxiety, substance  
232 abuse/dependence)  
233 • Less than five years in remission from any anxiety, substance abuse or eating disorder  
234 • History of substance dependence, bipolar or psychotic disorder  
235 • Current migraine with aura or a history of migraine with aura if less than 5 years prior to  
236 enrollment  
237 • Cigarette smoking  $>$  10 per day  
238 • Any history of migraine with or without aura in current cigarette smokers  
239

240 **Exclusion Criteria Specifically Designed to Minimize risk with respect to breast or ovarian**  
241 **cancer**

242 . We have designed the following exclusion criteria to ensure, as much as possible, that no  
243 woman enrolled in the study will have greater than 'average risk' (i.e., greater risk than seen in  
244 the population at large) for breast or ovarian cancer. Although the prevalence of BRCA1/2  
245 mutation positive breast cancer is approximately 5-10%, and it is estimated that only 1 in 250 –  
246 500 individuals would carry the BRCA 1/2 mutation (Schwartz GF, Hughes KS, Lynch HT,

247 Fabian CJ, et al., (2009). Proceedings of the International Consensus Conference on Breast  
248 Cancer Risk, Genetics and Risk Management, April, 2007. The Breast Journal, Vol 15 (1), 4-  
249 16), a thorough family history assessment will strengthen our ability to identify women who  
250 might be at 'very high risk' for breast cancer due to a high penetrance gene mutation (e.g.  
251 BRCA1/2, PTEN or Tp53). Additionally, although ovarian cancer is also associated with the  
252 BRCA 1/2 mutation, ovarian cancer is listed as a 'rare disease' by the Office of Rare Diseases at  
253 the NIH and therefore affects fewer than 200,000 persons in the U.S. population. The  
254 International Consensus Conference (Schwartz et al., 2008) concluded that a cancer family  
255 history collected through three generations should be considered sufficient to identify those at  
256 risk for a high penetrance genetic mutation. The history includes that of the index patient, as well  
257 as those of progeny, siblings, and parents, together with second degree relatives and both sets of  
258 grandparents.

259

260 Thus, to reduce as much as possible any risks associated with exposure to estradiol, we will  
261 obtain a comprehensive family history of cancer in each of our subjects to ensure that women  
262 enrolled into the present study would meet clinical criteria for 'average risk' (i.e., risk seen in the  
263 female population at large) of breast and ovarian cancer. Based on expert recommendations laid  
264 out in the report from The International Consensus Conference on Breast Cancer Risk, Genetics,  
265 and Risk Management (Schwartz et al., 2008) as well as the Gail model  
266 (<http://www.cancer.gov/bcrisktool>), a statistical model developed from a number of national  
267 large-scale studies (and currently the model approved by the FDA for determining who should be  
268 offered tamoxifen or raloxifene), we propose the following inclusion/exclusion criteria based on  
269 personal and family history (See attached self-report instrument that we intend to employ).

270

271 We will exclude women with:

- 272 • a personal history of breast cancer
- 273 • a personal history of more than one breast biopsy, or a personal history of even one breast  
274 biopsy with atypical hyperplasia
- 275 • more than one first degree relative with breast cancer
- 276 • premenopausal breast cancer in even one first degree relative,
- 277 • more than three first, second, or third-degree relatives with breast cancer regardless of  
278 age
- 279 • two or more first degree relatives with any cancer with onset before age 60
- 280 • multiple primary cancers in a single relative (particularly breast and ovarian)
- 281 • any male breast cancer (as it is almost exclusively related to the BRCA 1/2 mutation)
- 282 • ovarian cancer in even one first degree relative since that is assoc with a 25% chance of  
283 having the BRCA 1 mutation (Schwartz et al., 2008)
- 284 • any known BRCA mutation in first, second or third degree relatives
- 285 • a personal history of irradiation to the breast or chest wall prior to the age of 30, such as  
286 for Hodgkin disease, is associated with a very high risk for breast cancer
- 287 • Ashkenazi Jewish descent (those tracing their roots to central and eastern Europe) since  
288 two BRCA1 and one BRCA2 mutations are observed with higher frequency in Ashkenazi

289 Jews. Since, taken together, the frequency of these three mutations approximates 1 in 40  
290 in Ashkenazi Jews, we will not enroll women with this ancestral history, unless there is  
291 no family history of cancer (in which case the BRCA1/2 mutation frequency is not  
292 greater than its normal low prevalence).  
293

294 It is important to emphasize that the exclusion criteria listed above, based on family history  
295 profile, is primarily designed to detect high penetrance genetic heritability of breast cancer - a  
296 very low rate phenomenon. Thus, while the planned exclusion criteria are necessarily very  
297 conservative to ensure the least possible risk to participants, they are unlikely to exert any  
298 appreciable negative impact on our recruitment and enrollment goals. Even the exclusion of  
299 Ashkenazi Jews is unlike to detrimentally impact recruitment since fewer than 2.2 % of United  
300 States Jews reside in North Carolina.

301

## 302 **Study Design, Methods and Procedures**

303 **Overview of Protocol:** Briefly, medical and psychiatric evaluations will be conducted during an  
304 initial Screening period. Eligible women will then undergo initial Baseline Pretreatment  
305 assessments, including stress reactivity testing and assessments of baroreceptor sensitivity and  
306 endothelial function. Following Time 1 assessments, women will be randomized (in a 1:1  
307 fashion) to either transdermal 17 $\beta$ -estradiol (100 ug/day) or placebo for 12 months. Following  
308 randomization, during months 1, 2, 4, 6, 8, 10 and 12, compliance, side effects, vitals, depression  
309 symptoms and functional impairment will be assessed. Also, on a quarterly basis, oral  
310 micronized progesterone (200 mg/day x 12 days) will be given to ERT treated women. At the  
311 end of month 6 (Time 2 testing) and month 12 (Time 3 testing), while estradiol is still on board  
312 but prior to the final progesterone administration, all assessments conducted at baseline will be  
313 repeated. These events are described below.

### 314 **D.3. Procedures**

#### 315 **I. Screening Medical and Psychiatric Evaluations**

316 Following the informed consent process, subjects will complete a detailed medical and  
317 medication history form (enclosed); demographic data and height, weight and waist  
318 circumference will be obtained. Questionnaires assessing functional impairment, sleep quality  
319 and climacteric symptoms, diet and physical activity level will be administered (enclosed). The  
320 CES-D scale will also be administered. CES-D scores  $\geq 9$  will result in exclusion and referral  
321 for further evaluation. Stethoscopic BP will also be taken. Using JNC 7 guidelines, women  
322 exhibiting Stage 1 or Stage 2 hypertension (HTN) (140+ mmHg SBP and/or 90+ mmHg DBP)  
323 will be excluded and referred. Women will also have a fasting blood draw to determine FSH,  
324 plasma lipids (HDL-C, LDL-C, and triglycerides), and fasting glucose. As per the National  
325 Cholesterol Education Program (NCEP) and American Diabetes Association guidelines, fasting  
326 LDL  $\geq 190$  mg/dl or fasting glucose  $\geq 7.0$  mmol/l (126 mg/dl) (exclusionary) will prompt a  
327 referral. See A.4.8. for monitoring of change in health status during the course of the study.

328



329 Subjects meeting medical and psychiatric screening criteria will have a psychiatric evaluation  
330 with clinical psychologist Dr. Forneris, who will administer the Structured Clinical Interview for  
331 DSM-IV (SCID-NP with psychotic screen) for Axis I disorders and who will administer the  
332 cumulative trauma interview. Any woman meeting criteria for a current Axis I disorder will be  
333 excluded and referred for treatment. Women meeting psychiatric inclusion criteria will be  
334 scheduled for a gynecological exam with Dr. Steege who will take a complete medical history,  
335 including a history of estrogen-dependent neoplasia, a history of thrombophlebitis or  
336 thromboembolic disorders, gall bladder disease, liver dysfunction or other disorders for which  
337 estradiol or progesterone use is contraindicated. He will also perform a pelvic exam as well as  
338 endometrial ultrasound to confirm that they are free of any signs or history of endometrial  
339 disorder, abnormal uterine anatomy (e.g. fibroids), abnormal ovarian anatomy (e.g.  
340 endometrioma). If the endometrium is  $> 4$  mm, a routine endometrial biopsy will be performed  
341 to rule out endometrial cancer and to confirm eligibility for ERT. During the same exam Dr.  
342 Steege will also perform a breast exam. All women will be required to have a normal  
343 mammogram within one year of study enrollment (and one year thereafter). Screening  
344 mammograms will be provided for women who have not had one and one year mammograms  
345 provided for all subjects. An abnormal endometrial biopsy or detection of breast lump or  
346 abnormal screening mammogram will prompt a referral. Subjects who have a normal follow-up  
347 diagnostic mammogram will be allowed to continue in the study.

348 In order to control as much as possible for extraneous factors that vary with depression and  
349 impact cardiovascular risk (e.g., diet and exercise) all subject will have the American Heart  
350 Association DASH diet as well as exercise guidelines reviewed with them and each will be  
351 encouraged to adhere to them throughout the study (enclosed for review). We will review these  
352 with the subject at every study visit. This strategy will also minimize the likelihood that subjects  
353 will develop medical conditions (e.g. hypertension, hyperlipidemia) that would result in their  
354 withdrawal.

## 355 **II. BASELINE PRE-TREATMENT ASSESSMENTS (TIME 1)**

356 Subjects will arrive at the laboratory following an overnight fast have fasting blood samples  
357 taken for glucose and insulin. A meal will then be provided and subjects will undergo the  
358 following laboratory testing procedures.

### 359 **Laboratory Testing Procedures (see figure)**

360 **Baroreflex Sensitivity:** While supine, BP will be measured continuously using a noninvasive  
361 radial artery tonometric device. The time interval between successive R waves (RR interval) is  
362 determined via a standard 3-lead ECG. After 20 min of rest, 5 min of continuous BP and RR  
363 interval measurements will be recorded. The spontaneous fluctuations in SBP and RR interval  
364 will be analyzed using the Sequence Technique for baroreflex sensitivity (Measurements).

365 **Extended Baseline Rest (40 mins):** Following the intravenous (I.V.) setup and instrumentation  
366 for cardiovascular monitoring, a 30 min venipuncture recovery period will ensue, followed by a  
367 10 min pre-challenge baseline period for determining cardiovascular, neuroendocrine and  
368 inflammatory marker levels. During the pre-challenge baseline, cardiovascular measures will be  
369 taken at mins 2, 4, 6, 8 and 10 and averaged. Blood will be sampled at min 10 for  
370 norepinephrine (NEpi), ACTH, cortisol, Il-6 and high sensitivity (hs) CRP, and for pre-treatment  
371 estradiol and progesterone.

372 **The Trier Social Stress Test (TSST):** reliably induces large and consistent HPA-axis, CV,  
373 NEpi, and inflammatory responses and reliably differentiates depressed from non-depressed  
374 patients. The TSST involves the following: **Pre-Task Instructions:** (5 min) Subjects will be  
375 introduced to 3 people (the 'selection committee') after which the experimenter will ask the  
376 subject to take over the role of a job applicant who is invited for a personnel interview with the  
377 selection committee. **Anticipation Period:** The subject is left alone for 10 mins to prepare.  
378 **Speech:** The committee will return to the testing room where the managers ask the subject to  
379 deliver her talk for 5 mins. If the subject finishes before 5 mins, the managers respond with  
380 prepared questions to ensure that the subject speaks for the entire 5 mins. Immediately  
381 following, the committee will ask the subject to subtract the number 13 from 1,022 as fast and as  
382 accurately as possible for 5 mins. For each mistake, the subject is instructed to restart at 1,022.  
383 **Stress Recovery:** The subject sits alone and quiet for 90 mins.

#### 384 **CV and Neuroendocrine Sampling during Stress Testing:**

385 If primary hypotheses for Stress Reactivity are confirmed then for secondary analyses, we will  
386 examine reactivity scores for other measures reflecting sympathetic (cardiac output, pre-ejection  
387 period, plasma norepinephrine (Nepi)), and HPA (ACTH and the ACTH cortisol ratio) reactivity,  
388 and also basal CRP levels in order to further refine the CVD risk profile. Thus, cardiovascular  
389 measures will be taken at min 1,3,5,7, and 9 of the Anticipation Period, min 1,3, and 5 of Speech,  
390 and min 1,3 and 5 of serial subtraction and averaged to yield task levels. Cardiovascular  
391 measurements will also be taken at 5 minute intervals during the recovery period. NEpi will be  
392 sampled at the end of min 2 of Speech delivery and at the end of min 2 of serial subtraction since  
393 catecholamines peak within the first mins of stress. Cortisol and ACTH will be sampled during  
394 Stress Recovery at min 10, 20 and 30 since HPA-axis responses to stress are reliably found 10 –  
395 30 min after cessation of the TSST, and cortisol at 60 and 90 min to assess recovery. Although  
396 the precise time course for IL-6 responses to stress is not definitively determined, IL-6 shows a  
397 delayed response following acute stress. We will sample for IL-6 at 10, 30, 60, and 90 min,  
398 since other research found that depressed patients differed from controls in IL-6 reactivity to the  
399 TSST at 90 min post-stress. There is less evidence for stress-induced increases in CRP, so it will  
400 be taken at baseline rest only.

401 Total blood taken during baseline rest and stress testing = 100 ml (approximately 7 tablespoons)

402 Under the supervision of Dr. Hinderliter, **Flow Mediated Dilatation of the Brachial Artery**  
403 will be assessed by measuring changes in arterial diameter induced by reactive hyperemia  
404 (endothelial-dependent) versus nitroglycerin (endothelial-independent). Ultrasound images of  
405 the right brachial artery proximal to the antecubital fossa will be acquired. Baseline images will  
406 be obtained after 10 min of supine rest. Flow-mediated (endothelial dependent) dilatation will be  
407 assessed by determining the change in arterial diameter in response to reactive hyperemia  
408 induced by inflating a pneumatic occlusion cuff placed around the forearm to a suprasystolic  
409 pressure (approximately 200 mmHg) for 5 min. Images of the artery will be recorded for 2 min  
410 after cuff deflation. In order to confirm that any treatment-associated changes in flow mediated  
411 dilatation result from enhanced endothelial function, after 10 min of rest, a second baseline  
412 image will be acquired. Then, sublingual nitroglycerin spray (0.4 mg) will be administered to  
413 determine endothelium-independent vasodilation, and ultrasound images will be acquired for the  
414 subsequent 5 min. Flow-mediated and nitroglycerine-mediated dilation will be calculated as  
415 percentage changes in diameter from their respective baselines.

416 **III. Randomization and Pharmacological Intervention Procedures**

417 Under double-blind procedures, subjects will be randomized to receive either transdermal 17 $\beta$ -  
418 estradiol or placebo (as inert patches) for 12 months, stratified based on histories of recurrent  
419 depression (yes, no). The study statistician, Dr. Hamer will be responsible for creating the  
420 randomization scheme, and the UNC Hospitals Investigational Drug Services will manage the  
421 randomization and dispensing of all study medication in blinded form. The use of specially  
422 prepared patches with no outer label will allow both the subject and the experimenter to be blind  
423 to the intervention. For those 160 women randomized to receive transdermal estradiol, each will  
424 wear a patch (Climara®) designed to deliver 0.10 mg estradiol over a 24 hour period.  
425 Transdermal administration of estradiol produces mean serum concentrations of estradiol  
426 comparable to those produced by premenopausal women in the early follicular phase. Climara®  
427 continuously releases estradiol, which is transported across the intact skin leading to sustained  
428 circulating levels of estradiol during each 7-day treatment period. For the 160 women  
429 randomized to placebo, each will receive a placebo patch identical in appearance to the active  
430 patch (developed by 3M Pharmaceuticals).

431 **IV. 12 Month Intervention Phase**

432 Procedures during the Intervention: A monthly calendar outlining weekly schedules for changing  
433 patches, study visits, and the monthly schedule for taking micronized progesterone or placebo  
434 progesterone will be provided. Study visits will occur on months 1, 2, 4, 8, and 10 to allow for  
435 the careful monitoring of side effects and to ensure compliance. The same assessments will  
436 occur on months 6 and 12 as part of the laboratory testing schedule. All visits will occur during  
437 the first two weeks of the month, prior to progesterone/placebo administration. During the visits,  
438 vitals and side effects will be assessed as will depressive symptoms and functional impairment.  
439 SCID interviews will be conducted in those with CES-D scores > 10 to assess minor and major  
440 depression. Compliance will be determined (see below) and the next supply of medications will  
441 be dispensed. Validated questionnaires will be administered for sleep, climacteric symptoms, diet  
442 and physical activity. Quarterly, we will sample for estradiol to confirm compliance at the end  
443 of the trial.

444 Compliance checks (at every study visit): The following strategies will be used to ensure  
445 compliance: Subjects will: **1)** be educated on the importance of replacing their patches every 7  
446 days and we will develop an individualized behavioral strategy to increase the likelihood that the  
447 subject will do so (e.g., apply new patch every Sunday morning before church); **2)** record date  
448 of patch application on their calendars, reviewed at each study visit; **3)** bring their used and  
449 unused patches with them to every study visit; **4)** be asked whether they forgot to apply any  
450 patches and how many days late they were; **5)** be given extra patches and instructed to check to  
451 ensure patches are in place each day and to immediately replace any patch that may have fallen  
452 off; and **6)** be instructed that blood will be drawn for E2 in order to assess compliance.

453 Progesterone Administration: To prevent estradiol-induced endometrial hyperplasia, women  
454 randomized to active ERT will take 200 mg micronized progesterone/day for 12 days every 3  
455 months. Exposure to a progestin every 3 months is sufficient to protect the endometrium  
456 (Popp, A.W., et al., *Prevention of postmenopausal bone loss with long-cycle hormone*  
457 *replacement therapy*. *Maturitas*, 2006. **53**(2): p. 191-200). To help preserve the blind, we will  
458 administer progesterone under double-blind procedures. Women randomized to placebo-ERT

459 will take placebo progesterone each month, while those randomized to active ERT will take  
460 active progesterone every third month and placebo progesterone the other months. Thus, all  
461 women will take a blinded capsule during the last 12 days of each month. We have chosen to  
462 administer progesterone in a discontinuous fashion (which is adequate for safety) as opposed to  
463 using Climara Pro® (a transdermal system that delivers both estradiol and a progestin on a  
464 continuous basis) because the progesterone in the Climara Pro® system is a synthetic progestin  
465 (levonorgestrel) and because progestins antagonize many of estrogen's beneficial CV effects.  
466 This will allow for the examination of the effects of estradiol on the mechanisms proposed to  
467 mediate the link between depression and CVD without the confound of a continuous progestin.

#### 468 **V. Month 6 and Month 12 Testing (Times 2 and Time 3)**

469 During months 6 and 12, while estradiol is still on board but before the quarterly dose of  
470 micronized progesterone is administered, all procedures described above for pre-treatment (Time  
471 1) testing will be repeated, ensuring that the participant is wearing a patch at the time of testing.  
472 At the end of the 12 month, Time 3 testing women will be abruptly withdrawn from the  
473 intervention since in the majority of women, there is no definitive evidence that tapering the  
474 discontinuation of ERT is associated with fewer vasomotor symptoms in the majority of women  
475 (Aslan E, et al., *Maturitas*. 2007 Jan 20;56(1):78-83. Epub 2006 Oct 13; Grady D et al., *Am J*  
476 *Med*. 2005 Dec 19;118 Suppl 12B:163-5).

477

### 478 **MEASUREMENTS**

#### 479 **Cardiovascular Risk Measures**

480**1) Metabolic Risk:** We will employ National Cholesterol Education Program (NCEP) standard  
481 criteria for determining the Metabolic Syndrome based on blood pressure (BP) levels, abdominal  
482 obesity, and fasting triglyceride, HDL and glucose. For **BP:** subjects will be seated for 5 mins  
483 with arm supported at heart level. The auscultatory method will be used, employing a hand  
484 aneroid sphygmomanometer and stethoscope placed over the brachial artery at the inside of the  
485 elbow. A minimum of two BP measurements will be taken at least 5 mins apart and averaged to  
486 determine BP. **Waist Circumference** will be measured using the NHANES III Protocol <sup>6</sup>. The  
487 subject stands and the examiner palpates the upper hip bone to locate the right iliac crest to  
488 determine the mid-axillary line. The measuring tape is placed in a horizontal plane around the  
489 abdomen at this point and the measure is made at a normal minimal respiration. Following an  
490 overnight fast, blood will be sampled for **fasting triglycerides and HDL** (see assay descriptions  
491 below). We will also use **Insulin Sensitivity/Resistance to assess metabolic risk** using  
492 Homeostasis Model Assessment (HOMA) beta-cell index derived from a single fasting sample of  
493 glucose and insulin levels. This is the most widely used surrogate measure of insulin resistance  
494 (IR). Fasting HOMA-IR levels have been shown in large scale studies to predict CV events even  
495 after adjustment for other traditional risk factors. We will use the standard calculation for  
496 HOMA-IR, which is fasting insulin (uU/ml) times fasting glucose (mmol/l) divided by 22.5.  
497 Homa-IR has been validated in normoglycemic subjects against insulin sensitivity measured  
498 directly from the euglycemic-hyperinsulinemic clamp technique. Subjects will be considered  
499 insulin resistant on the basis of HOMA-IR > 3.2, consistent with other investigations.

500

501 **Metabolic Risk will be assessed at baseline, month 6 and month 12. Subjects will be**  
502 **classified as having metabolic risk if they either:** 1) meet standard NCEP criteria for  
503 metabolic syndrome based on any three of the following risk factors: (1) BP  $\geq$ 130/  $\geq$ 85 mmHg,  
504 (2) waist circumference  $>$  88 cm, (3) triglycerides  $\geq$  150 mg/dl, (4) HDL cholesterol  $<$  50 mg/dl,  
505 and (5) fasting glucose  $\geq$  110 mg/dl.; **or 2)** are insulin resistant, a clear metabolic predictor of  
506 CVD, i.e., if their HOMA-IR is  $>$  3.2. **2) Sequence Technique for estimating Baroreflex**  
507 **Sensitivity:** 5-min recording of BP and RR interval will be scanned for sequences in which SBP  
508 and the subsequent RR interval progressively increase or decrease over 3 consecutive beats.  
509 Sequences will be selected if successive pressure pulses differ by at least 1.0 mm Hg and  
510 successive RR intervals differ by at least 5.0 msec. Linear regression relating RR interval to  
511 SBP will be plotted for each sequence, and the slope of the function will be the estimate of BRS.  
512 Slopes derived from all sequences will be pooled so that one measures of baroreceptor sensitivity  
513 will be obtained. 3) **Blood Pressure and Vascular Resistance Reactivity to Stress:** The  
514 Suntech Exercise BP monitor, Model 4240 (SunTech Medical Instruments, Inc., Raleigh, NC),  
515 will provide automated measurement of BP during stress testing using the auscultatory  
516 technique. Initially, five standard stethoscopic BPs will be taken simultaneously with the  
517 automated pressures in order to insure correct microphone placement and cuff positioning.  
518 Impedance cardiography is noninvasive and involves recording changes in thoracic impedance  
519 by use of a tetrapolar electrode system, together with a standard ECG. Impedance cardiography  
520 has been extensively evaluated by comparison with traditional invasive techniques in human and  
521 animal studies. For each min of interest, a 30-s continuous sample of waveforms (obtained  
522 concurrently with BP) will be processed to generate an ensemble-averaged cardiac cycle, from  
523 which stroke volume will be determined and HR will be determined by the interbeat interval.  
524 Cardiac output and total peripheral resistance are calculated using standard formulae. To control  
525 for differences in BMI, measures will be adjusted for body surface area, yielding indexed scores  
526 (e.g. vascular resistance index (VRI)). **Flow Mediated Dilatation:** Digital gated images of the  
527 brachial artery will be acquired for analyses. Measurements will be performed using customized  
528 software (Vascular Analysis Tools, Medical Imaging Applications, LLC). Arterial diameter will  
529 be quantified by analysis of each image sequence, measuring from the intima-lumen interfaces of  
530 the proximal and distal arterial walls. Baseline resting arterial diameters will be quantified as the  
531 average of measurements on 10 or more images. Arterial diameters during reactive hyperemia  
532 and following nitroglycerin administration will be calculated as the average of measurements on  
533 3 consecutive images at maximum dilatation. Flow mediated and nitroglycerin-mediated  
534 dilatation will be expressed as percent changes in diameter relative to resting scans.

### 535 **Affective Well-Being Measures**

536 **1. Depression Episodes** will be operationalized in a manner consistent with other studies in  
537 perimenopausal depression<sup>7</sup> and based on the following assessments: **The Center for**  
538 **Epidemiologic Studies Depression scale (CES-D)** is a 20-item self-report form assessing  
539 depressed mood. CES-D scores  $\geq$  16 have been consistently validated as defining high  
540 depressive symptoms suggestive of clinically significant DEP (positive predictive value=75%),  
541 and this cut-point has been used to define depressive episodes in multiple perimenopausal  
542 samples. Moreover, elevated CES-D scores have been shown to be sensitive to the anti-  
543 depressant actions of ERT in PM women. **Thus, CES-D scores  $\geq$  16 will be used to**  
544 **operationally define ‘depression episodes’.** However, if CES-D scores are  $>$  10 at any study  
545 visit then the Structured Clinical Interview for DSM-IV (non-patient edition) will be

546 administered to determine the presence of either minor or major depression. **Functional**  
547 **Impairment:** We will use the widely used Medical Outcomes Study 36-item short form (SF-  
548 36), which yields scores of general health perceptions, physical functioning, role limitations due  
549 to physical functioning, social functioning, bodily pain, general mental health, role limitations  
550 due to emotional problems, and vitality. The rationale for the selection of this instrument is  
551 based on: 1) the demonstration that it is sensitive to change over time; 2) its incorporation of  
552 subscales to specifically assess functional impairment related to emotional and physical  
553 symptoms as well as overall social functioning; 3) its able to discriminate subgroups of CVD  
554 patients known to have poorer survival and worse disease; and 4) normative data for this scale  
555 are available for the general US population as well as 13 medical conditions. **Symptom**  
556 **Severity and Affective Instability** will be assessed with the CES-D scale (at baseline and  
557 months 2,4,6,8,10 and 12), the former with a repeated measures approach and the latter by the  
558 variance in the CES-D score over 12 months.

559 **Lifetime Trauma Exposure** will be assessed by a validated interview. A cumulative (total)  
560 trauma score will be generated by assigning one-point for each of the following 15 traumas: **1)**  
561 history of sexual abuse; **2)** history of physical abuse; **3)** moderate or greater childhood physical  
562 neglect; **4)** moderate or greater childhood emotional neglect; **5)** presence of 7 other types of  
563 trauma (one point each) before the age of 18; **6)** presence of 4 lifetime traumas (1 point each).  
564 The measure of lifetime *sexual and physical abuse history* is based on previous studies by  
565 Investigator, Dr. Leserman, and adapted from other research. Cumulative trauma exposure has  
566 been shown to independently predict the development of adverse medical conditions, to be  
567 related to a variety of risk factors for the leading causes of death; and to predict CV reactivity to  
568 acute laboratory stressors.

#### 569 **Benefits to Subjects and/or Society**

570 Subjects randomized to active ERT may experience a direct benefit, as treatment may reduce  
571 depressive episodes, improve quality of life, and reduce cardiovascular risk. The benefits to all  
572 subjects also include study-related medical evaluations, including a gynecological exam and  
573 mammograms. Subjects may also benefit by knowing that they are contributing to research  
574 aimed at enhancing our understanding of depression and cardiovascular risk in perimenopausal  
575 women. Even women who are excluded from participating based on medical or psychiatric  
576 criteria are intended to benefit to some degree since they will receive valuable feedback on their  
577 current medical and psychiatric status and referral for treatment when indicated. Society may  
578 benefit if this study yields knowledge on predictors of ERT benefit in perimenopausal women.

#### 579 **Risks and Measures to Minimize Risks**

580 The most likely risks involve side effects associated with the use of reproductive hormones  
581 (estradiol or progesterone).

582 The most frequent side effects associated with estradiol use include edema, breast tenderness,  
583 and changes in appetite and weight. Less frequent side effects include jaundice, nausea,  
584 abdominal cramps, increased blood pressure, headache and worsening of migraines or asthma,  
585 depression, nervousness, acne, cystitis-like syndrome, enlargement of uterine fibroids,  
586 intolerance to contact lenses and dizziness. Skin rash or irritation may also occur at site where  
587 the patch (containing estrogen) is placed. Progesterone - The most common side effects

588 associated with progesterone include breast tenderness, dizziness, abdominal bloating, vaginal  
589 discharge, chest pain, and diarrhea. Less common side effects include headache, dizziness,  
590 breast pain, musculoskeletal pain, and viral infection

### 591 **More Rare yet Serious Risks:**

592 The risk of **venous thromboembolism** (VTE) is clearly increased with HRT, with the risk  
593 influenced by age and preparation/type therapy. In the Women's Health Initiative Trial, the risk  
594 of VTE was greater with combined estrogen + progestin (HRT) (HR 2.06) than with conjugated  
595 equine estrogen alone (HR 1.32), with both risk rates reduced in the 50-59 year olds (estimated  
596 excess events 9-10/1,000 for HRT and 3-4/1000 for ERT) (Rossouw, J.E., et al., *Risks and*  
597 *benefits of estrogen plus progestin in healthy postmenopausal women: principal results From the*  
598 *Women's Health Initiative randomized controlled trial*. *Jama*, 2002. **288**(3): p. 321-33. Lyytinen,  
599 H., E. Pukkala, and O. Ylikorkala, *Breast cancer risk in postmenopausal women using estradiol-*  
600 *progestogen therapy*. *Obstet Gynecol*, 2009. **113**(1): p. 65-73).

601 Notably, the risk for VTE was significantly reduced by the use of transdermal estradiol in case  
602 control studies (HR 0.9 compared with HR 4.2 in those taking oral estrogen) (Scarabin, P.Y., et  
603 al., *Effects of oral and transdermal estrogen/progesterone regimens on blood coagulation and*  
604 *fibrinolysis in postmenopausal women. A randomized controlled trial*. *Arterioscler Thromb Vasc*  
605 *Biol*, 1997. **17**(11): p. 3071-8.

606 Both HRT and ERT increase the risk of **stroke** Hendrix, S.L., et al., *Effects of conjugated equine*  
607 *estrogen on stroke in the Women's Health Initiative*. *Circulation*, 2006. **113**(20): p. 2425-34).  
608 Not surprisingly, the increased risk is age-dependent (excess attributable risk 1 case per 5000  
609 women years in the 50-59 year olds vs 4.5 in the whole Women's Health Initiative Study group),  
610 largely reflecting the increased risk of stroke with aging.

611 **Breast Cancer** – Both HRT and ERT increase the risk of breast cancer (although the impact of  
612 duration and timing of therapy are still uncertain). Focusing on ERT (which decreases the risk  
613 compared with HRT by almost a factor of four) (Beral, V., *Breast cancer and hormone-*  
614 *replacement therapy in the Million Women Study*. *Lancet*, 2003. **362**(9382): p. 419-27), an early  
615 meta-analysis concluded that no increased risk of breast cancer occurred if estrogen alone was  
616 administered for less than five years (*Breast cancer and hormone replacement therapy:*  
617 *collaborative reanalysis of data from 51 epidemiological studies of 52,705 women with breast*  
618 *cancer and 108,411 women without breast cancer. Collaborative Group on Hormonal Factors in*  
619 *Breast Cancer*. *Lancet*, 1997. **350**(9084): p. 1047-59).

620 A subsequent meta-analysis reported a relative risk increase of 3.1%/year<sup>8</sup> Taking the worst  
621 case scenario, the risk in a 50-54 year old woman who takes estradiol alone for five years would  
622 increase from 13/1000 women (with no ERT) to 14.94/1000 women (Endocrine Society, in  
623 press). Thus, the risk of exposure to one year of ERT would be insubstantial. **Ovarian cancer** –  
624 Long term use of ERT alone increases the risk of ovarian cancer, with an attributable risk of 0.7  
625 per 1000 women per 5 years of use (Lacey, J.V., Jr., et al., *Menopausal hormone replacement*  
626 *therapy and risk of ovarian cancer*. *Jama*, 2002. **288**(3): p. 334-41.

627 326. Morch, L.S., et al., *Hormone therapy and ovarian cancer*. *Jama*, 2009. **302**(3): p. 298-  
628 305).

629 **Endometrial Cancer** - Exposure to unopposed estrogen increases the risk of endometrial cancer  
630 two fold (Grady, D., et al., *Hormone replacement therapy and endometrial cancer risk: a meta-*  
631 *analysis*. *Obstet Gynecol*, 1995. **85**(2): p. 304-13). Use of a progestin prevents both endometrial  
632 hyperplasia and the increased risk of endometrial cancer (Lethaby, A., et al., *Hormone*  
633 *replacement therapy in postmenopausal women: endometrial hyperplasia and irregular*  
634 *bleeding*. *Cochrane Database Syst Rev*, 2000(2): p. CD000402).

635 Although sequential use of progestin does not protect the endometrium to the same degree as  
636 continuous combined, long cycle sequential progestin (q 3 month progestin) (as is proposed for  
637 use in our study) has not been associated with increased risk of endometrial cancer (Furness, S.,  
638 et al., *Hormone therapy in postmenopausal women and risk of endometrial hyperplasia*.  
639 *Cochrane Database Syst Rev*, 2009(2): p. CD000402; Odmark, I.S., et al., *Endometrial safety*  
640 *and bleeding pattern during a five-year treatment with long-cycle hormone therapy*. *Menopause*,  
641 2005. **12**(6): p. 699-707).

642 **Risks Associated with Brachial Artery Imaging:** There are no significant risks associated with  
643 the ultrasound assessment of brachial artery imaging, though the inflation of the pneumatic cuff  
644 to 200 mmHg for 5 mins may be painful. Side effects associated with the sublingual  
645 administration of nitroglycerine include headache, dizziness, flushing or restlessness.

646 **Psychological Risks:** The structured interviews to assess current and lifetime psychiatric illness  
647 and prior trauma may be associated with some psychological distress. Some items in the  
648 questionnaires may provoke some negative emotion in some individuals. There is also the risk a  
649 woman will experience the onset of a depression episode or have a worsening of depressive  
650 symptoms over the course of the 12-month intervention period that would go undetected or  
651 untreated.

652  
653 Standard risks associated with venipuncture include syncope, discomfort, nausea, bruising.  
654 Although measures are taken to protect the privacy of every participant, there is a remote risk of  
655 breach of confidentiality/loss of privacy.

656

#### 657 **Protection Against Risk:**

658 • Risks associated with Estrogen and progesterone are minimized in our protocol by i) including  
659 only young, medically healthy perimenopausal women undergoing a natural menopause  
660 transition; ii) a thorough gynecological exam and medical history conducted by study  
661 gynecologist Dr. Steege to ensure that all women are eligible candidates for ERT; 3) the use of  
662 intermittent micronized progesterone (200 mg/day for 12 days every 3 months) to eliminate any  
663 increased risk of endometrial disorder associated with ERT and to avoid exposure to other  
664 progestins; 4) the requirement for a normal mammogram and breast exam at study entry; 5) the  
665 exclusion of women with a family history indicative of increased breast or ovarian cancer risk  
666 (see exclusion criteria in A.4.4. above); 5) exposure to estradiol for only 12 months since short-  
667 term exposure (< 3-5 yrs) has not been shown to be associated with an increased risk of breast  
668 cancer; 6) the frequent assessment of vitals, side effects and depression symptoms (months  
669 1,2,4,6,8,10 and 12); 7) the provision of instruction and instructional sheet (enclosed for review)  
670 for performing monthly self-breast exams; 8) provision of a patient information sheet with the  
671 instruction to call the study doctors immediately if any of the following symptoms are



672 experienced: severe or prolonged vaginal bleeding, severe headaches, changes in vision or  
673 speech, mental depression, nervousness, or suicidal thoughts, dizziness or faintness, pains in  
674 calves or chest, sudden shortness of breath, or detection of a breast lump; (enclosed for review);  
675 8) the development of a safety monitoring plan (see below); and 9) monitoring for adverse events  
676 by a Data and Safety Monitoring Committee.  
677

678 While risks associated with the endothelial flow mediated dilatation assessment may include  
679 discomfort or pain associated with inflation of the pneumatic cuff, the pain lasts only a few  
680 minutes and there is no risk of tissue damage during 5 minutes of forearm ischemia. Moreover,  
681 numerous studies in our laboratory using the submaximal effort tourniquet procedure to assess  
682 voluntary pain tolerance following inflation of a pneumatic arm cuff to 200 mmHg have reported  
683 that the average voluntary tolerance for women is approximately 650 seconds (> 10 mins), twice  
684 as long as the time required in the present study. Risks of dizziness associated with  
685 nitroglycerine will naturally be minimized since subjects will be in the supine position and  
686 instructed to stand up slowly. While headache may develop, our prior experience with this  
687 procedure is that headaches were mild, short-lived, and did not interfere with function.

688

689 Psychological risks associated with the interviews and stress testing are minimized via the use of  
690 clinically trained interviewers and highly competent and professional staff. Frequent contact  
691 with subjects and frequent assessment of depressive symptoms (months 1, 2, 4, 8, 10, and 12)  
692 will minimize the risk that a worsening of depressive symptoms would go undetected. Risks  
693 associated with phlebotomy will be minimized by using sterile materials, by applying pressure to  
694 the skin upon removal of the needle, and by placing each subject in the reclined position to  
695 minimize risk of syncope. Risks of loss of confidentiality will be minimized by the use of  
696 subject codes linked to all data and by maintaining the file linking the subject code to the name  
697 in a separate secure location. All databases will be stored on a secure, HIPAA compliant  
698 network. The server is backed up nightly. The database is also protected by logins and  
699 passwords required to open the system. Different levels of privileges are granted to different  
700 users. This study will use a web-based, secure, password protected access to the database.  
701 Passwords will be changed every 90 days.

702

### 703 **Data Monitoring and Analysis**

704 The safety of the study will be monitored by a **Data and Safety Monitoring Board (DSMB)**.  
705 This will ensure the independent oversight of issues related to safety and adverse events. This  
706 DSMB will consist of 4 members: a Cardiologist, a Psychiatrist, a Biostatistician, and a  
707 Gynecologist.

#### 708 **I. Grading of Adverse Events (AEs)**

709 Adverse events will be classified according to severity as either mild, moderate, or severe.  
710

711 **Mild AE:** is defined as having no effect on activities of daily living such as transient light  
712 headedness or sweating with venipuncture; breast tenderness, mild skin irritation; or something  
713 of equal significance that requires no medical intervention and is of marginal clinical relevance.  
714

715 **Moderate AE:** would be associated with temporary (minutes to a few days) disruption in  
716 activities of daily living such as temporary loss of consciousness with venipuncture; a worsening  
717 of migraines or headache that require bed rest, an increase in depression symptoms consistent  
718 with mild DEP mood (CES-D scores = 10 - 15), excess sleepiness or fatigue that resolves with  
719 additional rest, or something of equal significance.  
720

721 **Severe AE:** would cause serious disruption in daily activities of living and may or may not  
722 require hospitalization. Examples of such events would include a thromboembolic event, breast  
723 carcinoma, an increase in blood pressure consistent with Stage 2 hypertension, any  
724 cardiovascular event, any event that is permanently disabling, any event requiring hospitalization  
725 or is life threatening, severe mood impairment or failed suicide attempt or something of equal  
726 significance. Death would also be considered a severe AE.  
727

## 728 **II. Monitoring and Reporting of Adverse Events (AEs)**

729 The study coordinator will monitor side effects and AEs at all study visits (on a monthly basis  
730 initially and then quarterly) and report all side effects as well as any significant mood  
731 deterioration (see below) directly to Dr. Girdler following study visits. Side effects consistent  
732 with moderate or severe AEs or that are troublesome to the subject, or evidence of mood  
733 deterioration reported by telephone, will also be immediately reported to Dr. Girdler. Dr. Girdler  
734 will ensure that Dr. Rubinow or Dr. Steege are consulted within 24-hours. Staff will be  
735 specifically trained to monitor the CES-D rating scales for scores > 10 or for endorsement of  
736 suicidal ideation and report any such occurrence immediately. In the case of mood deterioration,  
737 Dr. Rubinow will determine the next course of action, including a reassessment of mood in two  
738 weeks or more urgently if deemed to be clinically required. Dr. Steege will be the responsible  
739 physician to determine the next course of action involving medical side effects (e.g., continue in  
740 protocol, exclude and refer for treatment).

741

742 The PIs, Dr. Rubinow and Girdler will review all protocol data at monthly meetings, including  
743 enrollment and retention statistics and aggregate reports of side effects/AEs. As the contact PI,  
744 Dr. Girdler will be the one responsible one to report any individual occurrence of an AE to the  
745 Chair of the DSMB according to the guidelines established at the initial DSMB meeting (e.g. the  
746 DSMB may require the reporting of any serious adverse event on an individual basis and in an  
747 on-going fashion). She will also report all moderate or severe AEs to the IRB and CTSC within  
748 1 week. Since we are employing a marketed pharmaceutical product (i.e., a non-IND study),  
749 unexpected Serious AEs will be also be reported to the FDA Medwatch Program. The NIMH  
750 program officer will be notified of any study modifications or suspension imposed by the DSMB  
751 or local IRB in response to an AE.

752 Dr. Girdler will also report all AEs graded as moderate or severe to the study gynecologist, who  
753 will maintain a secured, password protected file linking subject ID to subject name and will also

754 receive the randomization code by subject ID from Investigational Drug Services. In the event  
755 that it is medically necessary to become unblinded to treatment assignment, he will be able to do  
756 so very quickly.

757 We also have a plan for the monitoring of medical conditions that may emerge during the course  
758 of the 12 month study requiring treatment or withdrawal. The development of hypertension or  
759 hyperlipidemia represent the most likely medical conditions that may emerge over a 12 month  
760 interval in perimenopausal women. Our protocol allows for the frequent monitoring of BP levels  
761 (months 1, 2, 4, 6, 8, 10, and 12) throughout the protocol. Consistent with JNC 7 guidelines, the  
762 detection of BP levels during the study in the Stage 1 HTN range (140 – 159 mmHg SBP or 90 –  
763 99 mmHg DBP) will prompt monthly reassessments of BP to confirm BP status, and a review of  
764 the American Heart Association (AHA) dietary and physical activity guidelines with the subject.  
765 If the average BP over any 3 consecutive months remains in the Stage 1 HTN range, the subject  
766 will be withdrawn and referred for treatment. Detection of BP levels consistent with Stage 2  
767 HTN at any point will prompt immediate withdrawal and referral. Fasting LDL cholesterol will  
768 be measured at months 6 and 12 (Time 1 and 2 testing). However, in women with LDL-  
769 cholesterol > 190 mg/dl at month 6, a level for which the NCEP recommends therapeutic  
770 lifestyle changes and LDL-lowering drugs, we will re-assess fasting lipid profiles at months 8  
771 and 10. Should LDL again exceed 190 mg/dl on either determination, the subject will be  
772 withdrawn from the study and referred for treatment. If a subject develops coronary heart  
773 disease, venous thromboembolism, breast or endometrial or ovarian cancer, or biliary tract  
774 disease, she will be withdrawn from the study. Our plan to enroll only medically healthy  
775 perimenopausal women and to educate, encourage, and assess compliance with the AHA diet  
776 and exercise guidelines will minimize the development of medical conditions requiring  
777 withdrawal.

778 **General Statistical Considerations:** This is a two between subjects and one within-subjects  
779 (repeated measure) design. The two between-subjects factors are treatment (ERT or placebo,  
780 randomized) and history of DEP (positive or negative, non-randomized), and the within-subjects  
781 factor is time (psychiatric outcomes at months 0 (baseline), 1, 2, 4, 6, 8, 10, and 12, and CV  
782 measures at months 0, 6, 12). Analyses which use outcomes measured repeatedly will use this  
783 repeated measures design for analysis, with mixed models for continuous outcomes and logistic  
784 models for categorical outcomes. The mixed models we will fit will be random coefficient  
785 models, which treat the time variable as numerical. We do this for several reasons: (1) it allows  
786 for a finer assessment of precisely when women come in for a “visit,” as visits rarely take place  
787 on exactly the day planned, and (2) the covariance structure is necessarily simpler, leading to  
788 more efficient mixed models. For comparisons assessing change over time, we will assess this  
789 change as a difference between treatments or groups, as stated with respect to specific  
790 hypotheses, on differences between baseline and month 12 least squares means (LSMs). The  
791 month 6 CV data will be part of the mixed model predicting the 12 month least squares means.  
792 That is, the mixed model is an Intent- to-Treat analysis which uses all available data to make a  
793 prediction about what outcomes we would see if all subjects had remained in through the 12  
794 month endpoint. Several outcomes are measured or derived only once over the follow-up period  
795 (e.g., presence of at least one depressive episode during follow-up, or affective instability during  
796 the follow-up period). For those outcomes, the model will not include a repeated factor, and will  
797 be a two-factor ANOVA or logistic regression. For each analysis, where appropriate, we will  
798 perform sensitivity analyses by adding potential mediators, moderators, or confounders (see

799 D.4.3.) in an appropriate way to the model to assess the effect of these confounders, and to better  
800 define mechanisms, and subjects for whom, for example, treatment is effective. Most  
801 hypotheses will be examined as main effects, interactions, or contrasts. Prior to statistical  
802 analyses, we will use descriptive statistics and graphics to screen the data for errors, outliers, and  
803 potential influential observations, and to check distributional assumptions. We will not blindly  
804 switch to non-parametrics if distributions within groups do not appear to be normal, but will  
805 judge whether the type and degree of non-normality are such which require rethinking our  
806 modeling assumptions. We have a relatively large sample size and our linear models should be  
807 robust to relatively mild violations of normality. Even so, in the event we decide that the linear  
808 or linear mixed models we've selected are not appropriate, we will examine the possibility of  
809 testing hypotheses using permutation tests, sampling from the permutation distribution, in  
810 preference to non-parametrics.

811 We will define *affective instability* as the variance of each subject's CED-D total score over her  
812 follow-up period. We define the CV risk variable *Stress Reactivity*, as a composite formed in the  
813 following way: for IL-6, Mean Arterial Pressure, Vascular Resistance, and Cortisol, we will  
814 form the difference between resting and stress measures, yielding *reactivity* for each measure.  
815 We will calculate mean and SD for each measure at baseline (pre-treatment) and use those to  
816 standardize each measure at baseline (pre-treatment) and during the intervention to a common  
817 scale. We will then add the z-scores for the 4 measures together to form our stress reactivity  
818 composite at each point measured.

819 **Multiple Testing:** Several of the hypotheses use multiple outcome measures. We have in each  
820 identified one outcome as the primary outcome variable, and testing on this variable will be done  
821 without correction for multiple comparison. We will only examine other variables if the null  
822 hypothesis is rejected for the primary outcome variable. This enables us to follow significant  
823 effects with other analyses to explain or refine the response, helping us interpret the results.

824

## 825 **SPECIFIC AIMS AND HYPOTHESES:**

826 **Aim 1: To confirm that PM women with histories of recurrent DEP will, at baseline, suffer**  
827 **from greater CV risk relative to never DEP PM women, and to examine the role of**  
828 **cumulative trauma exposure in the relationship of history of recurrent DEP and CV risk.**

829

830 **H1:** When compared with never DEP women, women with histories of recurrent DEP will  
831 exhibit a greater Stress Reactivity composite score. If confirmed, the following parallel  
832 secondary hypotheses will be examined in hierarchical order: Women with histories of recurrent  
833 DEP will exhibit: 1) an increased rate of metabolic risk; and 2) reduced endothelial flow-  
834 mediated dilatation and baroreceptor sensitivity.

835 **H2: Secondary Hypothesis:** Cumulative trauma exposure will moderate the relationship between  
836 histories of recurrent DEP and CV risk such that greater trauma exposure will explain part of the  
837 relationship between DEP history and elevated CV risk (tested with sensitivity analyses).

838 **Aim 2: To examine progression in CV risk and affective well-being over 12 months in**  
839 **untreated PM women as a function of histories of DEP.**

840 In the 160 women randomized to placebo we will test the following hypotheses by comparing  
841 women with a history of DEP with never depressed women for changes over 12 months:

842 **H1:** Relative to baseline reactivity, untreated women with a history of DEP will show a greater  
843 increase in the Stress Reactivity composite score over 12 months compared with never DEP  
844 women. If confirmed, the following parallel hypotheses will be examined in hierarchical order:  
845 In women with a history of DEP: 1) there will be a greater increase in rate of metabolic risk; and  
846 2) a greater reduction in endothelial flow-mediated dilatation and baroreceptor sensitivity.

847 **H2:** A greater proportion of untreated women with a history of DEP will exhibit episodes of  
848 DEP over 12 months compared with untreated women without a history of DEP. If confirmed,  
849 the following parallel hypotheses will be examined in hierarchical order: Untreated women with  
850 a history of DEP will have 1) higher CES-D DEP scores; 2) increased functional impairment;  
851 and 3) increased affective instability (greater variance in CES-D over 12 months).

852 **Aim 3: To examine predictors and mediators of ERT- related treatment efficacy for**  
853 **affective well-being and CV risk.**

854 In the 320 women randomized to treatment we will test the following hypotheses:

855 **H1A:** Women on active treatment will show a decreased Stress Reactivity composite score over  
856 12 months relative to baseline levels and relative to the change (increased stress reactivity) in  
857 women on placebo. If confirmed, the following parallel hypotheses will be examined in  
858 hierarchical order: Women on active treatment will show 1) a lower rate of metabolic risk; and 2)  
859 increased endothelial flow-mediated dilatation and baroreceptor sensitivity. These hypotheses  
860 will be tested as main effects of treatment.

861 **H1B:** A history of DEP will predict a greater effect of ERT on Stress Reactivity: i.e., a greater  
862 decrease in Stress Reactivity (relative to baseline) between active and placebo treated women  
863 will be seen in women with a history of DEP (due to their higher baseline reactivity) compared  
864 with never DEP women. If confirmed, the following parallel hypotheses will be examined in  
865 hierarchical order: a history of DEP will predict a greater effect of ERT for 1) reductions in rate  
866 of metabolic risk, and 2) increased endothelial flow-mediated dilatation and baroreceptor  
867 sensitivity. These hypotheses will be tested as interactive effects (history by treatment).

868 **H2:** Although no subjects will be depressed at baseline, active treatment will be associated with  
869 a lower proportion of women experiencing episodes of DEP over 12 months relative to placebo  
870 treated women. If confirmed, the following parallel hypotheses will be examined in hierarchical  
871 order: Active treatment will be associated with: 1) lower CES-D DEP scores; 2) decreased  
872 functional impairment; and 3) decreased affective instability.

873 **H3: Secondary Hypothesis:** Treatment-related reductions in Stress Reactivity will partially  
874 mediate the beneficial effect of E2 on DEP episodes. If confirmed, the following parallel  
875 hypotheses will be examined in hierarchical order: Treatment reductions in Stress Reactivity will  
876 partially mediate reductions in 1) CES-D DEP rating scores; 2) Functional Impairment; and 3)  
877 Affective Instability (tested with sensitivity analyses).

878 **DATA ANALYTIC PLAN FOR EACH HYPOTHESIS**

879 **Aim 1 Hypothesis 1:** Since subjects have not yet been assigned to treatment, we will treat  
880 analyses of baseline data as two-group analyses rather than a main effect in a two-by-two  
881 factorial. The Stress Reactivity composite score as the response. If the null hypothesis is  
882 rejected, we will examine the same contrast for metabolic risk (as a parallel logistic regression  
883 model since it is categorical), flow mediated dilatation, and baroreceptor sensitivity.

884 **Aim 1 Hypothesis 2:** This secondary analysis will add the effect of trauma to the model, and  
885 assess whether trauma moderates the effect of DEP history on CV risk variables (above).

886 **Aim 2 Hypothesis 1:** In the mixed random coefficients model we will use for this repeated  
887 measures analysis, we will test this hypothesis using a contrast that examines the difference  
888 between the women with and without histories of DEP on the difference between the month 0  
889 and month 12 least squares means. This contrast will be done in the context of the full model but  
890 involves means from 2 of the 4 between-subjects cells. If this null hypothesis is rejected, we will  
891 test the same hypotheses for flow mediated dilatation and baoreceptor sensitivity (mixed model),  
892 and examine metabolic risk (categorical) via parallel logistic regression model.

893 **Aim 2 Hypothesis 2:** We will fit a two-factor logistic regression predicting the presence or  
894 absence of DEP episodes during the follow-up period. If we reject the null hypothesis, we will  
895 follow this with a two-factor mixed random coefficient model using CED-D, functional  
896 impairment and (using without the repeated measures portion since affective instability is  
897 defined over the entire follow-up period) affective instability as defined earlier. Further, as  
898 sensitivity analyses, we will examine the same effect on number of episodes / month during the  
899 follow-up period, using Poisson regression, and on the CES-D scores themselves using a mixed  
900 model.

901 **Aim 3 Hypothesis 1 (A and B):** With stress reactivity as the response, we will test these  
902 hypotheses in the context of the two between-factor one-repeated factor mixed random  
903 coefficient model we listed earlier. Hypothesis H1A is the main effect for treatment, predicting  
904 that the difference between the change in LSMs from month 0 to month 12 will be in different  
905 directions in the treated and untreated women. If this null hypothesis is rejected, we will examine  
906 parallel effects on metabolic risk (via a logistic regression), baroreceptor sensitivity, and flow  
907 mediated dilatation. Hypothesis H1B involves partitioning the interaction effect in these models.

908 **Aim 3 Hypothesis 2:** This will be examined in a logistic regression model with two between-  
909 subjects factors (DEP history and treatment) and the emergence of at least one DEP episode as  
910 the response. This is the treatment main effect in the model. If we reject the null hypothesis, we  
911 will examine the same hypothesis using CED-D total (mixed model), functional impairment  
912 (mixed model), number of episodes (Poisson regression), and affective instability (mixed model).

913 **Aim 3 Hypothesis 3 (secondary):** This hypothesis will use a logistic regression model with two  
914 between-subjects factors as above, the emergence of at least one DEP episode as the response,  
915 and stress reactivity in the model as a mediator.

916

917 **POWER AND SAMPLE SIZE CALCULATIONS FOR EACH SPECIFIC AIM:**

918 It is not feasible to conduct power analyses for every hypothesis. While this is a mechanistic  
 919 study designed, in part, to examine mediators of E2's beneficial effects on CV risk and DEP, we  
 920 must first be able to detect a beneficial effect of E2. Thus, we conduct power for Aim 3, H2.  
 921 We also felt it important, however, to confirm we are powered to detect meaningful differences  
 922 in the Stress Reactivity composite score since it is our primary CV outcome variable and also a  
 923 predicted mediator.

924 **Aim 3 Hypothesis 2:** Based on the work of Freeman et al (Menopause, 2009. **16**(4): p. 728-34)  
 925 for rates in untreated women, and our prediction that ERT will cut the rate of depression by 50%  
 926 (a clinically relevant difference), we predict the following percentages of women will experience  
 927 at least one DEP episode during the follow-up in our groups:

928

|            |          | Treatment Assigned |         |
|------------|----------|--------------------|---------|
|            |          | ERT                | Placebo |
| Depression | Positive | 22.5               | 45      |
| History    | Negative | 15                 | 30      |
| (Combined) |          | (18.75%)           | (37.5%) |

929

930 The hypothesis corresponds to using logistic regression to test the depressive episode rate  
 931 between all those treated with ERT (18.75%) versus those treated with placebo (37.5%). Using a  
 932 logistic regression with this effect size, a two-tailed significance level of 0.05, and 240 total  
 933 subjects, power exceeds 96%. Further, power should be higher for the parallel poisson  
 934 regression on number of episodes, and for the analysis of the CES-D scores themselves.

935 **Aim 1, H1:** Our primary hypothesis for Aim 1 involves Stress Reactivity and since we cannot  
 936 assert that any stress-responsive factor is more important than another in this context, we will  
 937 combine different measures of stress-responsive CV risk factors and combine them into an index  
 938 called Stress Reactivity, described above. Since this measure has not been used before, we do  
 939 not have information from prior research on means and standard deviations which could help  
 940 with power and sample size calculations. Instead, we performed power calculations for each of  
 941 the stress reactivity variables which comprise the composite score. We used differences between  
 942 DEP and non-DEP groups from Pace et al. (Am J Psychiatry, 2006. **163**(9): p. 1630-3) for IL-6;  
 943 from Young et al. (Neuropsychopharmacology, 2000. **23**(4): p. 411-8) for cortisol; from  
 944 Brownley et al. (Am J Obstet Gynecol, 2004. **190**(4): p. 1052-8) for clinically relevant  
 945 differences in MAP; and from Girdler (Health Psychol, 2007. **26**(2): p. 201-13; Int J  
 946 Psychophysiol, 1994. **17**(3): p. 233-48).for group differences in VRI – using the reported group  
 947 differences to define the magnitude of differences which are important, and to obtain estimates  
 948 of SDs. We obtained effect sizes of 0.63, 0.86, 1.0, and 1.5 for differences in delta MAP, VRI,  
 949 IL-6, and Cortisol, respectively. Our sample size of 160 per DEP group yields **99% power to**  
 950 **reject a null hypothesis** of no effect for an effect size of 0.63, (the smallest above), and 80%  
 951 power to detect an effect size as small as 0.40. Due to the complexity of the random coefficient

952 model to be used for this variable, we approximated our calculations with a simpler ANOVA  
953 power on change scores. Our actual power should be higher because the model should be more  
954 precise.

955 **Inducements for Participation**

956 Total possible monetary inducement for participating = \$1,275, prorated as follows:

957 \$100 for the medical and psychiatric screening (these screenings also provide benefit in the form  
958 of free medical evaluations)

959 \$150 for each laboratory test session (\$450 total)

960 \$100 for each flow mediated dilatation procedure (\$300 total)

961 \$ 25 for each interim study visit (\$125 total)

962 \$300 compliance bonus for completing the study in full compliance

963

964
